# Supplementary material
Source: PubMed Central journal article supplement (PMC3374314)
Supplement: supp_111.137844_FigureS2.pdf [file supp_111.137844_FigureS2.pdf]

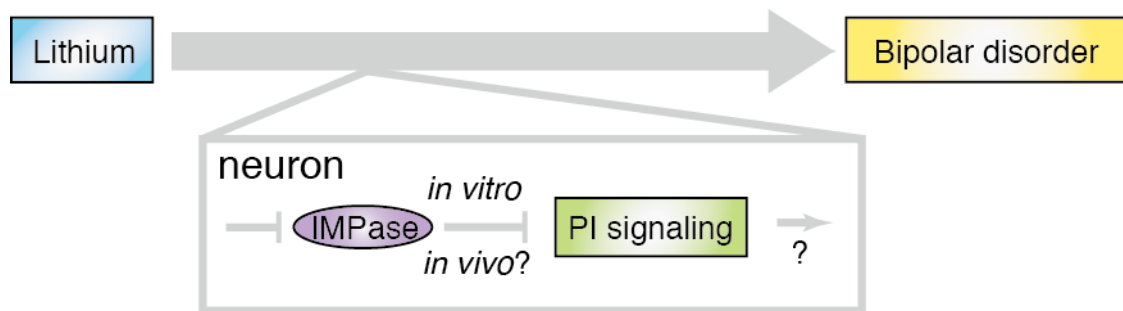

**Figure S2** The inositol depletion hypothesis. The hypothesis explains that lithium exerts its effect on bipolar disorder via inhibition of IMPase. The inhibition of IMPase assumed to interfere with neuronal PI signaling but it has never been proven in vivo.
