# Supplementary material
Source: PubMed Central journal article supplement (PMC3374314)
Supplement: supp_111.137844_FigureS3.pdf [file supp_111.137844_FigureS3.pdf]

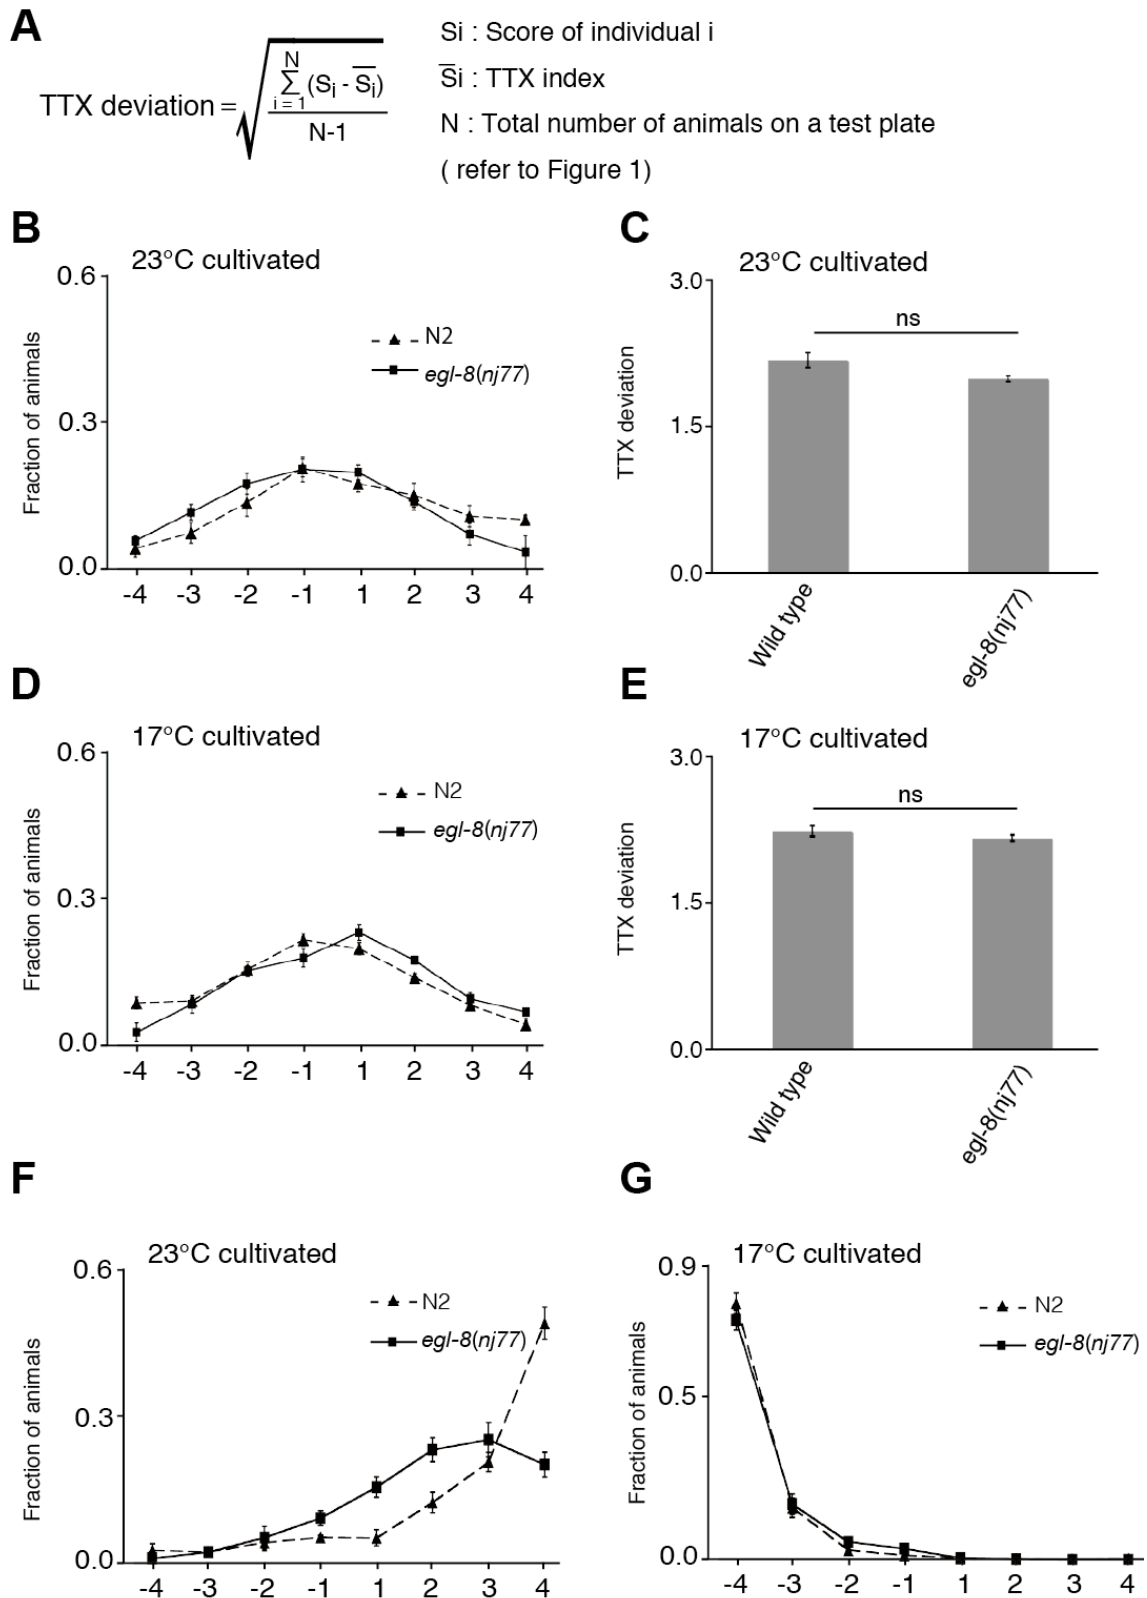

**Figure S3** Thermotaxis behavior of *egl-8(nj77)* mutants. **(A)** The equation for calculating the TTX deviation. **(B and D)** Distributions of wild-type and *egl-8(nj77)* mutants on TTX plate without the temperature gradient ( $n \geq 4$  assays). Animals cultivated at 23° **(B)** or 17° **(D)** were placed at the center of the plate and left for 60 min at 20°. **(C and E)** TTX deviations of

wild type and *egl-8(nj77)* mutants cultivated at 23° (C) and 17° (E). Although the TTX deviation of *egl-8* mutants was slightly lower than that of wild-type animals, the difference was not statistically significant. *t*-test was applied ( $n \geq 4$  assays). **(F and G)** Animals cultivated at 23° (F) or 17° (G) were assayed in the population thermotaxis assay for 120 min ( $n \geq 4$  assays). In contrast to the 60 min assay, *egl-8(nj77)* mutants cultivated at 17° migrated to the cultivation temperature as comparable to wild-type animals, but they did not at 23°.
