# Supplementary material
Source: PubMed Central journal article supplement (PMC3374314)
Supplement: supp_111.137844_FigureS4.pdf [file supp_111.137844_FigureS4.pdf]

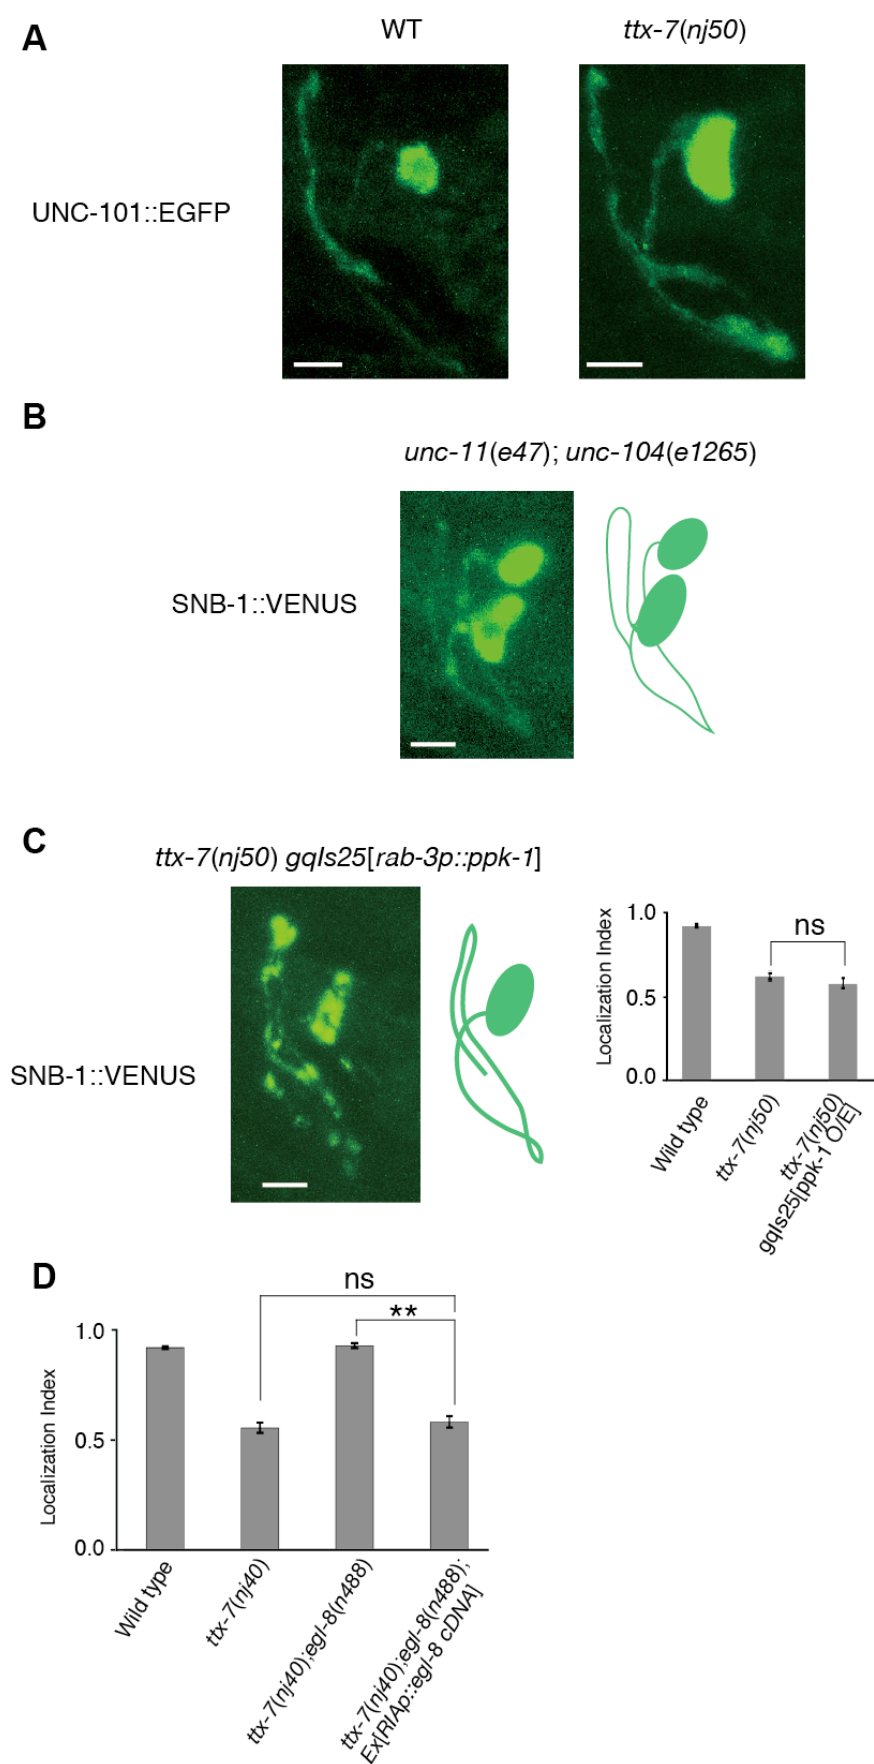

**Figure S4** Localizations of synaptic components in RIA neuron. (A) The localization of UNC-101::GFP in RIA neuron. As described in Margeta et al. (2009), UNC-101::GFP was exclusively localized to the presynaptic region in wild-type animals. It

was mislocalized to the proximal region of the process in *ttx-7(nj50)* mutants. **(B)** The localization of SNB-1::VENUS in *unc-11(e47);unc-104(e1265)* double mutants. The fluorescence of SNB-1::VENUS was quite dim but observed in the entire process of RIA neuron. Scale bar, 5 $\mu$ m. **(C)** The representative image of the localization of SNB-1::VENUS in *ttx-7(nj50) gqls25[rab-3p::ppk-1]* mutants and the localization indices of SNB-1::VENUS in each genotype. The overexpression of *ppk-1* gene did not suppress the localization defect in *ttx-7* mutants. Steel-Dwass multiple comparison test was performed ( $n \geq 8$  animals). Scale bar, 5 $\mu$ m. **(D)** RIA-specific expression of *egl-8* cDNA rescued the suppression of the SNB-1-localization defect by *egl-8(n488)* mutation. Steel-Dwass multiple comparison test was performed ( $n \geq 15$  animals).
